# Supplementary material for: CircIBTK inhibits DNA demethylation and activation of AKT signaling pathway via miR-29b in peripheral blood mononuclear cells in systemic lupus erythematosus
Source: Springer Nature journal article supplement (doi:10.1186/s13075-018-1618-8), 2018-06-08
Supplement: MOESM2 [file 15831988]

**Figure S1**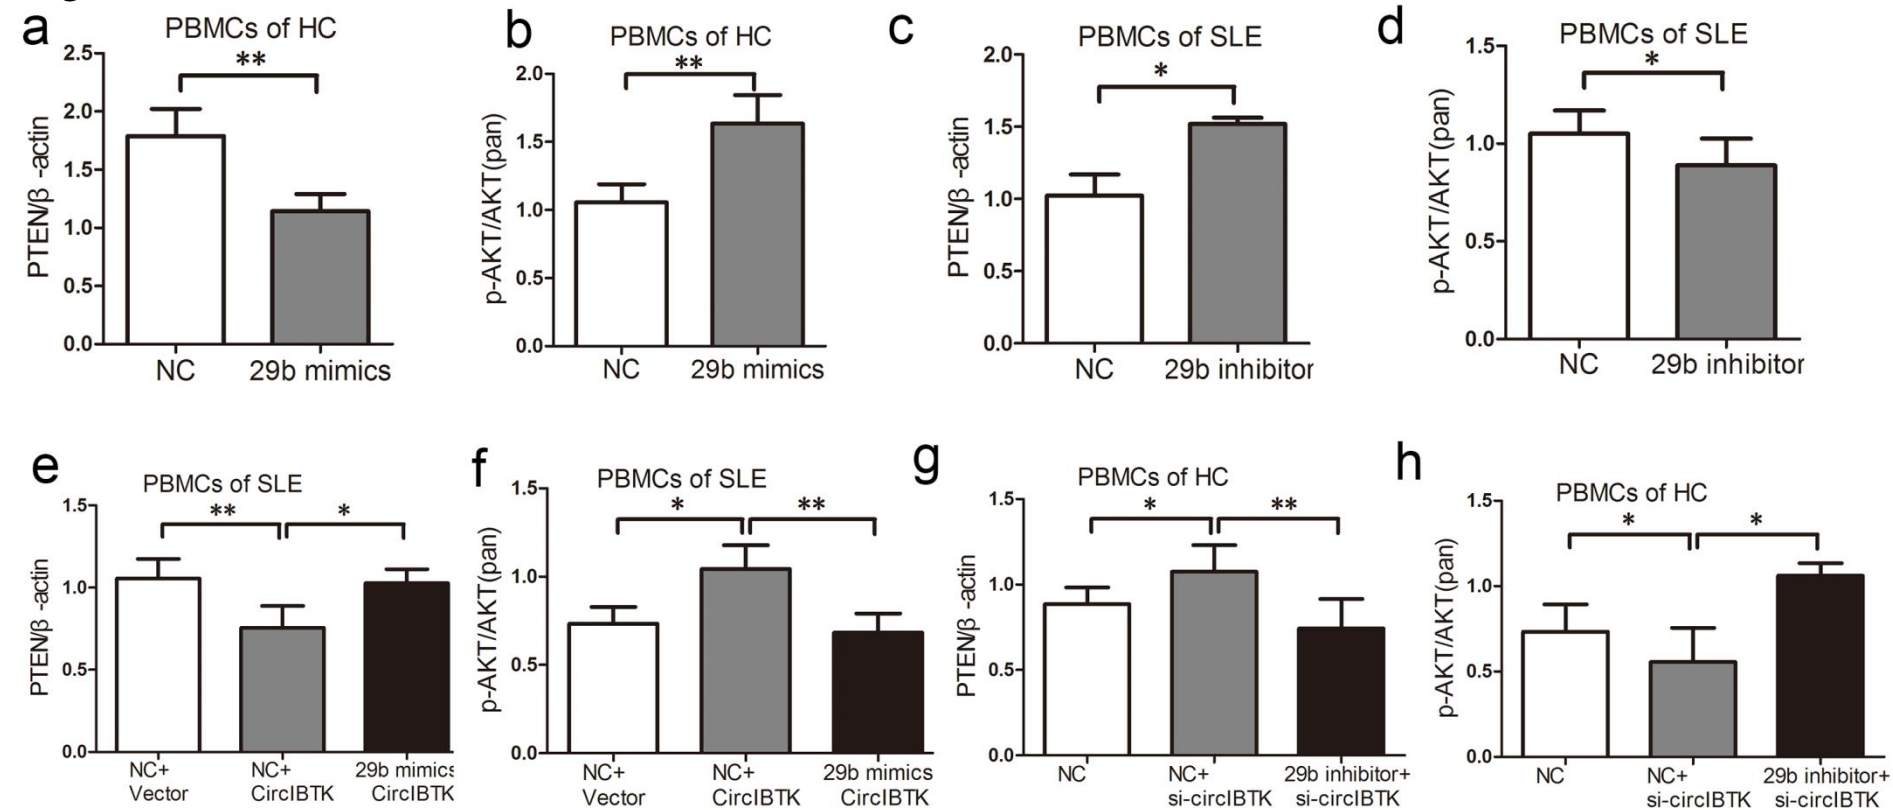

(a and b) Statistical analysis of the cumulative densitometry data for Western blot analysis of PTEN expression and AKT phosphorylation in PBMCs of HC transfected with miR-29b mimics. (c and d) Statistical analysis of the cumulative densitometry data for Western blot analysis of PTEN expression and AKT phosphorylation in PBMCs of SLE transfected with miR-29b inhibitor. (e and f) Statistical analysis of the cumulative densitometry data for Western blot analysis of PTEN/AKT signaling related proteins in PBMCs of SLE transfected with miR-29b mimics, circIBTK expression plasmids, NC oligonucleotides or empty vector. (g and h) Statistical analysis of the cumulative densitometry data for Western blot analysis of PTEN/AKT signaling related proteins in PBMCs of HC transfected with miR-29b inhibitor, circIBTK siRNA or NC oligonucleotides. Three replicate experiments were performed. The cumulative densitometry data were compared with paired Student's t-test and results were represented as mean  $\pm$  SD (n=3). \*P<0.05, \*\*P<0.01.
